# Supplementary material for: Alteration in the sensitivity to crizotinib by Na+/H+ exchanger regulatory factor 1 is dependent to its subcellular localization in ALK-positive lung cancers
Source: Springer Nature journal article supplement (doi:10.1186/s12885-020-6687-9), 2020-03-12
Supplement: MOESM1 [file 17793534]

Suppl figure 1 for publication

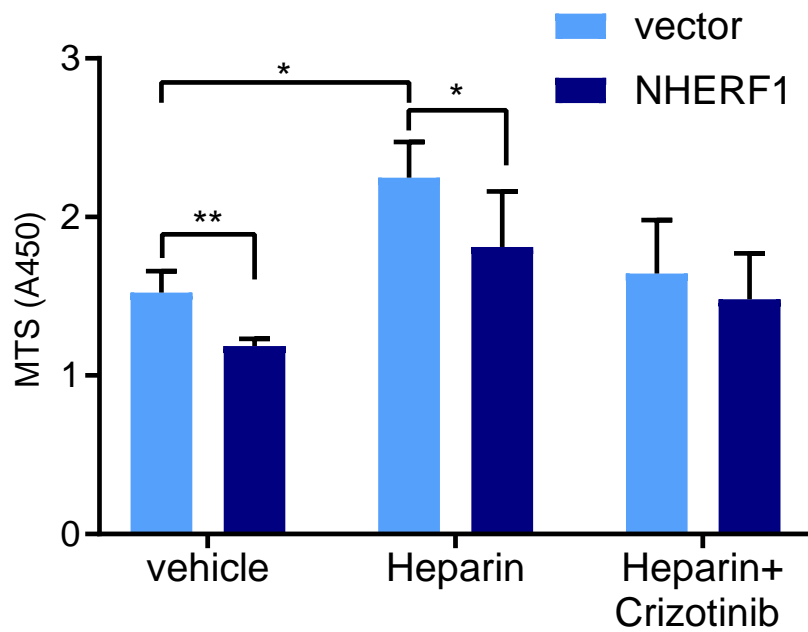

Suppl figure 1. The cell viability from MTS assays in H3122 and NHERF1 overexpressed cells in the presence of heparin (1  $\mu\text{g}/\text{ml}$ ), or crizotinib (1  $\mu\text{M}$ ), or both for 72 h. \* $p < 0.05$ , \*\* $p < 0.01$ .
